# Supplementary material for: PALM-USM v1.0: A new urban surface model integrated into the PALM large-eddy simulation model
Source: Copernicus journal article supplement (doi:10.5194/gmd-10-3635-2017), 2017-10-09
Supplement: Supplementary file 1 [file gmd-10-3635-2017-supplement.zip]

Archive with 3 entries (3 files):
- gmd-2017-61-Supplement-tables-figures.pdf
- gmd-10-3635-2017-supplement-title-page.pdf
- gmd-2017-61-USM_configuration.pdf
