# Supplementary material for: PALM-USM v1.0: A new urban surface model integrated into the PALM large-eddy simulation model
Source: Copernicus journal article supplement (doi:10.5194/gmd-10-3635-2017), 2017-10-09
Supplement: Supplementary file 1 [file gmd-10-3635-2017-supplement.zip › gmd-10-3635-2017-supplement-title-page.pdf]

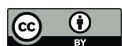

## *Supplement of*

# **PALM-USM v1.0: A new urban surface model integrated into the PALM large-eddy simulation model**

**Jaroslav Resler et al.**

*Correspondence to:* Jaroslav Resler ([reslejar@fd.cvut.cz](mailto:reslejar@fd.cvut.cz))

- [gmd-10-3635-2017-supplement-title-page.pdf](#)
- [gmd-2017-61-Supplement-tables-figures.pdf](#)
- [gmd-2017-61-USM\\_configuration.pdf](#)

The copyright of individual parts of the supplement might differ from the CC BY 3.0 License.
