# Supplementary material for: PALM-USM v1.0: A new urban surface model integrated into the PALM large-eddy simulation model
Source: Copernicus journal article supplement (doi:10.5194/gmd-10-3635-2017), 2017-10-09
Supplement: Supplementary file 1 [file gmd-10-3635-2017-supplement.zip › gmd-2017-61-USM_configuration.pdf]

# Urban surface model

September 2, 2017

This document contains the description of configuration parameters and input files of Urban Surface Model (USM) which is an optional module of the model PALM.

## A Configuration file PARIN

### 1 Section &d3par

New options were added into the original PALM variable data\_output. All new data output variables have prefix “usm\_”, most of them also one of suffixes “\_roof”, “\_west”, “\_east”, “\_south”, “\_north”. Suffix “\_roof” means horizontal surfaces, e.g. ground or roof, the other represent walls facing into corresponding direction. Most of variables can also be averaged by “\_av” suffix like other PALM variable. Next list omits all prefixes and suffixes. Thus to include e.g. the surface temperatures of east walls into the output the name usm\_t\_surf\_east has to be added to data\_output configuration variable.

| Variable name    | Explanation                                                                     |
|------------------|---------------------------------------------------------------------------------|
| surfz            | height of surface                                                               |
| surfcatt         | category of the surface                                                         |
| surfalb          | albedo of the surface                                                           |
| surfemis         | emissivity of the surface                                                       |
| radnet           | net radiation for given surface                                                 |
| rad_insw         | total incoming shortwave radiation                                              |
| rad_inlw         | total incoming longwave radiation                                               |
| rad_inswdir      | incoming direct shortwave radiation                                             |
| rad_inswdif      | incoming diffusion shortwave radiation                                          |
| rad_inswref      | reflected shortwave radiation                                                   |
| rad_inlwdif      | incoming diffusion longwave radiation                                           |
| rad_inlwref      | reflected longwave radiation                                                    |
| rad_outsw        | total outgoing shortwave radiation                                              |
| rad_outlw        | total outgoing longwave radiation                                               |
| rad_ressw        | residua of sw radiation absorbed in surface after last reflection               |
| rad_reslw        | residua of lw radiation absorbed in surface after last reflection               |
| rad_hf           | heat flux caused by radiation                                                   |
| t_surf           | surface temperature                                                             |
| t_wall-{k}       | temperature of k-th layer of the wall/ground/roof corresponding to surface      |
| wshf             | surface heat flux                                                               |
| wghf             | ground heat flux                                                                |
| lad              | leaf area density in gridbox                                                    |
| canopy_hr        | heat rate from absorbed radiation in canopy                                     |
| svf-{i}-{j}-{k}  | shape view factors of surface adjacent to gridbox i,j,k (diagnostic only)       |
| diff-{i}-{j}-{k} | transparency factors of surface adjacent to gridbox i,j,k (diagnostic only)     |
| isroof           | 0 for grounds, 1 for roofs (diagnostic only)                                    |
| thickness        | thickness of the complete layer structure of ground/wall/roof (diagnostic only) |

## 2 Section &urban\_surface\_par

The presence of the section &urban\_surface\_par enables USM in PALM. The available configuration parameters are:

| Parameter Name            | FORTTRAN Type | Default Value | Explanation                                                                                    |
|---------------------------|---------------|---------------|------------------------------------------------------------------------------------------------|
| split_diffusion_radiation | L             | .T.           | perform splitting of total sun/sky radiation to the direct/diffusion part                      |
| usm_energy_balance_land   | L             | .T.           | calculate energy balance for horizontal surfaces (diagnostic only)                             |
| usm_energy_balance_wall   | L             | .T.           | calculate energy balance for vertical surfaces (diagnostic only)                               |
| usm_material_model        | L             | .T.           | calculate diffusion of heat in ground, walls and roofs                                         |
| usm_anthropogenic_heat    | L             | .F.           | calculate anthropogenic heat in USM model                                                      |
| mrt_factors               | L             | .F.           | compute factor for postprocessing calculation of MRT (mean radiant temperature)                |
| nrefsteps                 | I             | 0             | number of reflections in radiation model                                                       |
| naheatlayers              | I             | 0             | number of layers of anthropogenic heat                                                         |
| inner_temperature_wall    | R             | 295.0         | temperature of the inner wall surface (inside the building)(K)                                 |
| inner_temperature_roof    | R             | 295.0         | temperature of the inner wall surface (inside the building) (K)                                |
| inner_temperature_soil    | R             | 288.0         | temperature of the deep soil (K)                                                               |
| land_category             | I             | 1             | default category for land surface                                                              |
| pedestrian_category       | I             | 2             | default category for wall surface in pedestrian zone                                           |
| wall_category             | I             | 2             | default category for wall surface over pedestrian zone                                         |
| roof_category             | I             | 2             | default category for roof surface                                                              |
| roughness_concrete        | R             | 0.001         | roughness length of average concrete surface (m)                                               |
| write_svf_on_init         | L             | .T.           | write calculated svf and csf to files                                                          |
| read_svf_on_init          | L             | .T.           | read svf and csf from files instead of their calculation                                       |
| read_wall_temp_3d         | L             | .F.           | initialize temperature of wall layers and surfaces from file instead of using default profiles |
| usm_lad_rma               | L             | .T.           | enables using one-sided MPI operations for distribution of LAD values between processes        |

## 3 Section &canopy\_par

A new value is available for parameter canopy\_mode in canopy\_par section:

|             |                   |                                                                                     |
|-------------|-------------------|-------------------------------------------------------------------------------------|
| canopy_mode | read_from_file_3d | read the 3D structure of plant canopy from file<br>PLANT_CANOPY_DATA_3D (see later) |
|-------------|-------------------|-------------------------------------------------------------------------------------|

## B Input files

### 1 URBAN\_SURFACE

This file contains column-separated surfaces and their properties. Each gridbox [i,j] describes properties of corresponding horizontal surface (ground or roof) and possible walls adjacent to right (east) and north edge of the gridbox. The wall is described in three zones – pedestrian, wall and roof. The height of each zone can be configured independently for each gridbox [i,j]. The vertical structure described in this file have to exactly correspond to structure given in the file TOPOGRAPHY\_DATA. Structure of each record follows:

Basic parameters:

|        |                                                       |
|--------|-------------------------------------------------------|
| i, j   | coordinates                                           |
| height | height of horizontal surface, i.e. ground or roof (m) |
| nz     | height of horizontal surface in grid points           |
| isroof | horizontal surface is roof (1) or ground (0)          |
| dirwe  | index of west-east wall ( $=nz(i+1,j)-nz(i,j)$ )      |
| dirsn  | index of south-north wall ( $=nz(i,j+1)-nz(i,j)$ )    |

Horizontal surface parameters:

|            |                                                      |
|------------|------------------------------------------------------|
| surfcats   | number of category of surface                        |
| surfalbedo | albedo of surface (overrides albedo of the category) |
| roofthick  | thickness of roof material                           |

Wall parameters:

|                                     |                                                        |
|-------------------------------------|--------------------------------------------------------|
| wenz1                               | height of the pedestrian zone of the west-east wall    |
| wecat1                              | category of the pedestrian zone of the west-east wall  |
| wealbedo1                           | albedo of the pedestrian zone of the west-east wall    |
| wethick1                            | thickness of the pedestrian zone of the west-east wall |
| wenz2, wecat2, wealbedo2, wethick2  | the same parameters for wall zone                      |
| wenz3, wecat3, wealbedo3, wethick3  | the same parameters for roof zone                      |
| snnz1, sncat1, snalbedo1, snthick1, | the same for south-north wall                          |
| snnz2, sncat2, snalbedo2, snthick2, |                                                        |
| snnz3, sncat3, snalbedo3, snthick3  |                                                        |

### 2 SURFACE\_PARAMETERS

This file describes categories of surfaces (ground, roofs and walls) and its properties (column-separated). Some parameters (emissivity, albedo and thickness) can be overwritten for particular surfaces in the file URBAN\_SURFACE.

|             |                                                                                    |
|-------------|------------------------------------------------------------------------------------|
| cat         | number of category                                                                 |
| albedo      | albedo of the surface (default value, can be override by individual values)        |
| emissivity  | emissivity of the surface                                                          |
| lambda_s    | heat conductivity the surface skin layer ( $\text{W m}^{-2} \text{K}^{-1}$ )       |
| roughness   | roughness length of surface z0 for movements (m)                                   |
| roughness_h | roughness length of surface z0h for scalars (heat, humidity) (m)                   |
| csurf       | thermal capacity of the surface skin layer ( $\text{J m}^{-2} \text{K}^{-1}$ )     |
| thickness   | thickness of the surface (wall, roof, land) materials (m)                          |
| rho_c       | volumetric heat capacity rho·C of the material ( $\text{J m}^{-3} \text{K}^{-1}$ ) |
| lambda_h    | thermal conductivity lambda_h of the wall ( $\text{W m}^{-1} \text{K}^{-1}$ )      |
| name        | description of category (only for readability of the file)                         |

### 3 PLANT\_CANOPY\_DATA\_3D

The file is column-separated and describes a three-dimensional structure and properties of the resolved plant canopy (trees, shrubs) within the grid of the model. First line contains a single integer number prescribing the number N of vertical levels (from model bottom) which may contain plant canopy. Further lines contain values of four variables that describe the plant canopy. Each line specifies values of one variable for one column of the model grid ( $x=i, y=j, z=*$ ) as follows:

|                 |                                                                                                                                                                                       |
|-----------------|---------------------------------------------------------------------------------------------------------------------------------------------------------------------------------------|
| varnum          | number of input variable<br>1 = leaf area density (lad.s)<br>2 = canopy drag coefficient (cdc)<br>3 = leaf scalar exchange coefficient (lsec)<br>4 = leaf surface concentration (lsc) |
| i,j             | horizontal coordinates of the grid column                                                                                                                                             |
| v1, v2, ..., vN | values of variable varnum for levels [nzb, nzb+1, ...] where nzb<br>is model bottom                                                                                                   |

Any non-specified values (i.e. coordinates that have no entry in the file and everything above level N) are treated as zero for all four variables.

## 4 ANTHROPOGENIC\_HEAT

The file describes anthropogenic heat.

|         |                                                           |
|---------|-----------------------------------------------------------|
| i, j, k | coordinates of gridbox                                    |
| aheat   | daily average of anthropogenic heat ( $\text{W m}^{-2}$ ) |

## 5 ANTHROPOGENIC\_HEAT\_PROFILE

The file describes diurnal profiles of the anthropogenic heat.

|           |                                                                                       |
|-----------|---------------------------------------------------------------------------------------|
| ihour     | hour of the day                                                                       |
| layer     | layer of released heat                                                                |
| aheatcoef | coefficient of diurnal profile of anthropogenic heat<br>(ah_hour = aheat · aheatcoef) |
